# Supplementary material for: Heavy pnicogen atoms as electron donors in sigma-hole bonds
Source: Royal Society of Chemistry journal article supplement (doi:10.1039/d3cp03479h), 2023-01-01
Supplement: d3cp03479h1.pdf [file d3cp03479h1.pdf]

## Supplementary Information

### Heavy Pnictogen Atoms as Electron Donors in Sigma-Hole Bonds

Akhtam Amonov<sup>a</sup> and Steve Scheiner<sup>b,\*</sup>

<sup>a</sup>Department of Optics and Spectroscopy  
Engineering Physics Institute  
Samarkand State University  
140104, University blv. 15, Samarkand  
Uzbekistan

<sup>b</sup>Department of Chemistry and Biochemistry  
Utah State University  
Logan, Utah 84322-0300  
USA

Table S1.  $E_{\text{def}}$  (kcal/mol) of individual subunits, base listed first followed by acid.

| perfluoro        |           |           |                   |                    |                    |                   |           |            |                   |                    |                    |
|------------------|-----------|-----------|-------------------|--------------------|--------------------|-------------------|-----------|------------|-------------------|--------------------|--------------------|
|                  | FH        | FBr       | F <sub>2</sub> Se | F <sub>3</sub> As  | F <sub>4</sub> Ge  |                   | FH        | FBr        | F <sub>2</sub> Se | F <sub>3</sub> As  | F <sub>4</sub> Ge  |
| NH <sub>3</sub>  | 0.01+0.79 | 0.09+1.09 | 0.06+1.29         | 0.03+0.79          | 0.07+16.14         | NMe <sub>3</sub>  | 0.20+1.95 | 0.49+2.22  | 0.45+2.51         | 0.28+1.68          | 1.44+21.74         |
| PH <sub>3</sub>  | 0.19+0.08 | 1.30+1.67 | 0.26+0.41         | 0.09+0.71          | 0.17+1.69          | PMe <sub>3</sub>  | 0.29+0.30 | 4.15+10.47 | 3.00+6.10         | 0.37+0.57          | 4.93+22.16         |
| AsH <sub>3</sub> | 0.14+0.05 | 1.06+1.71 | 0.19+0.22         | 0.04+0.06          | 0.09+0.90          | AsMe <sub>3</sub> | 0.26+0.05 | 3.42+7.06  | 1.29+2.51         | 0.25+0.30          | 3.93+18.43         |
| SbH <sub>3</sub> | 0.11+0.04 | 0.78+1.84 | 0.13+0.18         | 0.05+0.05          | 0.04+0.55          | SbMe <sub>3</sub> | 0.18+0.10 | 2.27+5.77  | 0.75+1.67         | 0.16+0.15          | 0.28+2.95          |
| monofluoro       |           |           |                   |                    |                    |                   |           |            |                   |                    |                    |
|                  | FH        | FBr       | FHSe              | FH <sub>2</sub> As | FH <sub>3</sub> Ge |                   | FH        | FBr        | FHSe              | FH <sub>2</sub> As | FH <sub>3</sub> Ge |
| NH <sub>3</sub>  | 0.01+0.79 | 0.09+1.09 | 0.02+0.55         | 0.01+0.28          | 0.01+0.01          | NMe <sub>3</sub>  | 0.20+1.95 | 0.49+2.22  | 0.30+1.33         | 0.15+0.74          | 0.16+2.59          |
| PH <sub>3</sub>  | 0.19+0.08 | 1.30+1.67 | 0.32+0.41         | 0.08+0.05          | 0.06+0.06          | PMe <sub>3</sub>  | 0.29+0.30 | 4.15+10.47 | 1.93+3.44         | 0.41+0.43          | 0.12+0.34          |
| AsH <sub>3</sub> | 0.14+0.05 | 1.06+1.71 | 0.23+0.16         | 0.06+0.04          | 0.05+0.03          | AsMe <sub>3</sub> | 0.26+0.05 | 3.42+7.06  | 1.19+1.73         | 0.25+0.19          | 0.11+0.18          |
| SbH <sub>3</sub> | 0.11+0.04 | 0.78+1.84 | 0.11+0.14         | 0.06+0.03          | 0.03+0.03          | SbMe <sub>3</sub> | 0.18+0.10 | 2.27+5.77  | 0.63+0.99         | 0.11+0.09          | 0.05+0.05          |

Table S2. Intermolecular distances R(Å)

| Perfluoro        |       |       |                   |                    |                    |                   |       |       |                   |                    |                    |
|------------------|-------|-------|-------------------|--------------------|--------------------|-------------------|-------|-------|-------------------|--------------------|--------------------|
|                  | FH    | FBr   | F <sub>2</sub> Se | F <sub>3</sub> As  | F <sub>4</sub> Ge  |                   | FH    | FBr   | F <sub>2</sub> Se | F <sub>3</sub> As  | F <sub>4</sub> Ge  |
| NH <sub>3</sub>  | 1.680 | 2.361 | 2.449             | 2.656              | 2.121              | NMe <sub>3</sub>  | 1.572 | 2.248 | 2.303             | 2.456              | 2.116              |
| PH <sub>3</sub>  | 2.357 | 2.499 | 3.059             | 3.437              | 3.243              | PMe <sub>3</sub>  | 2.239 | 2.307 | 2.520             | 3.179              | 2.467              |
| AsH <sub>3</sub> | 2.472 | 2.668 | 3.240             | 3.569              | 3.429              | AsMe <sub>3</sub> | 2.379 | 2.484 | 2.824             | 3.360              | 2.627              |
| SbH <sub>3</sub> | 2.668 | 2.814 | 3.426             | 3.738              | 3.651              | SbMe <sub>3</sub> | 2.604 | 2.674 | 3.054             | 3.611              | 3.393              |
| Monofluoro       |       |       |                   |                    |                    |                   |       |       |                   |                    |                    |
|                  | FH    | FBr   | FHSe              | FH <sub>2</sub> As | FH <sub>3</sub> Ge |                   | FH    | FBr   | FHSe              | FH <sub>2</sub> As | FH <sub>3</sub> Ge |
| NH <sub>3</sub>  | 1.680 | 2.361 | 2.527             | 2.725              | 2.731              | NMe <sub>3</sub>  | 1.572 | 2.248 | 2.348             | 2.501              | 2.469              |
| PH <sub>3</sub>  | 2.357 | 2.499 | 2.871             | 3.291              | 3.451              | PMe <sub>3</sub>  | 2.239 | 2.307 | 2.515             | 2.922              | 3.269              |
| AsH <sub>3</sub> | 2.472 | 2.668 | 3.116             | 3.391              | 3.564              | AsMe <sub>3</sub> | 2.379 | 2.484 | 2.718             | 3.132              | 3.413              |
| SbH <sub>3</sub> | 2.668 | 2.814 | 3.250             | 3.556              | 3.752              | SbMe <sub>3</sub> | 2.604 | 2.674 | 2.957             | 3.411              | 3.655              |

## Cartesian Coordinates of Complexes

### **NH<sub>3</sub>···HF**

|   |              |              |              |
|---|--------------|--------------|--------------|
| 1 | 1.580863000  | 0.014455000  | 0.944407000  |
| 1 | 1.582703000  | -0.824218000 | -0.461339000 |
| 1 | 1.576427000  | 0.813011000  | -0.484489000 |
| 9 | -1.419981000 | -0.000099000 | 0.000004000  |
| 1 | -0.464673000 | -0.000948000 | 0.000412000  |
| 7 | 1.214929000  | -0.000202000 | 0.000139000  |

### **NH<sub>3</sub>···BrF**

|    |              |              |              |
|----|--------------|--------------|--------------|
| 1  | 2.552206000  | -0.014890000 | 0.951059000  |
| 1  | 2.552972000  | -0.816215000 | -0.489924000 |
| 1  | 2.549177000  | 0.833047000  | -0.463024000 |
| 9  | -1.965532000 | 0.000171000  | -0.000380000 |
| 7  | 2.206684000  | 0.000041000  | -0.000128000 |
| 35 | -0.154610000 | -0.000108000 | 0.000177000  |

### **NH<sub>3</sub>···SeF<sub>2</sub>**

|    |              |              |              |
|----|--------------|--------------|--------------|
| 9  | -0.119080000 | 1.393867000  | -0.000031000 |
| 9  | 1.941503000  | -0.005036000 | 0.000122000  |
| 1  | -2.761957000 | -1.043427000 | 0.000977000  |
| 1  | -2.494644000 | 0.361588000  | 0.820055000  |
| 1  | -2.495243000 | 0.360161000  | -0.820658000 |
| 34 | 0.206413000  | -0.321906000 | -0.000050000 |
| 7  | -2.238286000 | -0.176143000 | 0.000071000  |

### **NH<sub>3</sub>···AsF<sub>3</sub>**

|    |              |              |              |
|----|--------------|--------------|--------------|
| 1  | -2.624551000 | 0.901987000  | 0.225796000  |
| 1  | -3.017022000 | -0.192348000 | -0.935209000 |
| 1  | -2.538859000 | -0.700732000 | 0.551341000  |
| 33 | 0.263339000  | -0.000270000 | -0.368101000 |
| 9  | -0.065299000 | -1.286144000 | 0.729713000  |
| 9  | 1.948239000  | 0.011496000  | 0.032410000  |
| 9  | -0.084642000 | 1.275802000  | 0.735142000  |
| 7  | -2.384919000 | -0.001482000 | -0.167139000 |

### **NH<sub>3</sub>···GeF<sub>4</sub>**

|    |              |              |              |
|----|--------------|--------------|--------------|
| 32 | -0.163208000 | -0.000322000 | 0.000038000  |
| 9  | 0.056148000  | 0.967234000  | 1.408993000  |
| 9  | -1.881964000 | -0.000661000 | 0.000205000  |
| 9  | 0.056266000  | 0.739505000  | -1.540711000 |
| 9  | 0.056673000  | -1.704573000 | 0.131098000  |
| 1  | 2.311569000  | -0.413146000 | 0.858213000  |
| 1  | 2.311715000  | 0.949028000  | -0.070993000 |

|   |             |              |              |
|---|-------------|--------------|--------------|
| 1 | 2.311918000 | -0.536663000 | -0.786313000 |
| 7 | 1.957619000 | -0.000353000 | 0.000232000  |

### **NH<sub>3</sub>···SeFH**

|    |              |              |              |
|----|--------------|--------------|--------------|
| 9  | -1.971175000 | 0.131749000  | 0.000007000  |
| 1  | 2.672813000  | -0.881917000 | 0.005840000  |
| 1  | 2.691722000  | 0.529781000  | -0.825379000 |
| 1  | 2.692540000  | 0.540044000  | 0.819265000  |
| 34 | -0.195156000 | -0.094594000 | 0.000003000  |
| 7  | 2.326460000  | 0.070085000  | 0.000020000  |
| 1  | 0.033574000  | 1.351954000  | -0.000020000 |

### **NH<sub>3</sub>···AsFH<sub>2</sub>**

|    |              |              |              |
|----|--------------|--------------|--------------|
| 1  | -2.831149000 | -0.152537000 | -0.903229000 |
| 1  | -2.862372000 | -0.571499000 | 0.675129000  |
| 1  | -2.827688000 | 1.007803000  | 0.249524000  |
| 33 | 0.243661000  | -0.132772000 | -0.020285000 |
| 9  | 1.988997000  | 0.194918000  | 0.026825000  |
| 7  | -2.472239000 | 0.088938000  | 0.013111000  |
| 1  | -0.053419000 | 0.667597000  | 1.242096000  |
| 1  | -0.061495000 | 1.053278000  | -0.927323000 |

### **NH<sub>3</sub>···GeFH<sub>3</sub>**

|    |              |              |              |
|----|--------------|--------------|--------------|
| 32 | -0.250968000 | -0.000486000 | -0.000505000 |
| 9  | -2.015585000 | 0.001267000  | 0.001382000  |
| 1  | 2.852150000  | -0.792535000 | -0.509070000 |
| 1  | 2.848546000  | -0.044783000 | 0.943534000  |
| 1  | 2.851385000  | 0.839501000  | -0.430373000 |
| 7  | 2.479667000  | 0.000557000  | 0.000534000  |
| 1  | 0.089458000  | 1.247585000  | 0.828587000  |
| 1  | 0.086329000  | -1.343852000 | 0.664114000  |
| 1  | 0.085717000  | 0.094327000  | -1.496815000 |

### **PH<sub>3</sub>···HF**

|    |              |              |              |
|----|--------------|--------------|--------------|
| 1  | 1.793781000  | -0.951226000 | -0.735381000 |
| 1  | 1.797346000  | 1.112330000  | -0.452641000 |
| 1  | 1.791035000  | -0.164373000 | 1.192561000  |
| 9  | -2.225120000 | 0.000014000  | 0.000069000  |
| 1  | -1.294244000 | 0.000689000  | -0.001533000 |
| 15 | 1.062544000  | 0.000164000  | -0.000242000 |

### **PH<sub>3</sub>···BrF**

|   |              |              |              |
|---|--------------|--------------|--------------|
| 1 | 2.692577000  | 1.223985000  | -0.062838000 |
| 1 | 2.669137000  | -0.562250000 | 1.103841000  |
| 1 | 2.683847000  | -0.679869000 | -1.026140000 |
| 9 | -2.338613000 | -0.003094000 | 0.001768000  |

|    |              |              |              |
|----|--------------|--------------|--------------|
| 15 | 2.009352000  | -0.000344000 | -0.000025000 |
| 35 | -0.489667000 | 0.001461000  | -0.000869000 |

**PH<sub>3</sub>···SeF<sub>2</sub>**

|    |              |              |              |
|----|--------------|--------------|--------------|
| 9  | 0.345270000  | 1.410597000  | -0.000189000 |
| 9  | 2.362256000  | -0.097731000 | 0.001035000  |
| 1  | -3.276634000 | -0.525184000 | -1.043576000 |
| 1  | -3.273854000 | -0.528448000 | 1.044769000  |
| 1  | -2.830836000 | 1.231633000  | 0.002855000  |
| 15 | -2.424797000 | -0.115137000 | 0.000109000  |
| 34 | 0.628986000  | -0.301963000 | -0.000391000 |

**PH<sub>3</sub>···AsF<sub>3</sub>**

|    |              |              |              |
|----|--------------|--------------|--------------|
| 1  | 3.641187000  | -1.037422000 | -0.278679000 |
| 1  | 3.640303000  | 1.038315000  | -0.277889000 |
| 1  | 2.753046000  | -0.000595000 | 1.288840000  |
| 33 | -0.727883000 | 0.000001000  | -0.372721000 |
| 9  | -0.283911000 | 1.268271000  | 0.692704000  |
| 9  | -2.378234000 | -0.000012000 | 0.098513000  |
| 9  | -0.283875000 | -1.268275000 | 0.692684000  |
| 15 | 2.699985000  | -0.000013000 | -0.119172000 |

**PH<sub>3</sub>···GeF<sub>4</sub>**

|    |              |              |              |
|----|--------------|--------------|--------------|
| 32 | -0.668206000 | -0.000064000 | -0.000426000 |
| 9  | -0.217547000 | -0.359095000 | -1.594706000 |
| 9  | -2.366983000 | -0.001536000 | 0.006068000  |
| 9  | -0.213619000 | -1.203119000 | 1.103386000  |
| 9  | -0.219610000 | 1.561983000  | 0.483279000  |
| 1  | 3.328954000  | -1.060269000 | -0.538309000 |
| 1  | 3.287710000  | 0.067581000  | 1.211749000  |
| 1  | 3.301451000  | 1.021482000  | -0.639025000 |
| 15 | 2.574955000  | -0.000724000 | -0.000202000 |

**PH<sub>3</sub>···SeFH**

|    |              |              |              |
|----|--------------|--------------|--------------|
| 9  | 2.385078000  | 0.141153000  | 0.001801000  |
| 1  | -2.976324000 | -0.554501000 | -1.052570000 |
| 1  | -2.964537000 | -0.585224000 | 1.043079000  |
| 1  | -2.977468000 | 1.242607000  | 0.021851000  |
| 15 | -2.253456000 | 0.035507000  | -0.000058000 |
| 34 | 0.614556000  | -0.095727000 | -0.000707000 |
| 1  | 0.359564000  | 1.348835000  | -0.003655000 |

**PH<sub>3</sub>···AsFH<sub>2</sub>**

|   |              |             |              |
|---|--------------|-------------|--------------|
| 1 | -3.377561000 | 0.324312000 | -1.115429000 |
|---|--------------|-------------|--------------|

|    |              |              |              |
|----|--------------|--------------|--------------|
| 1  | -3.211809000 | -1.129683000 | 0.355792000  |
| 1  | -3.234797000 | 0.877371000  | 0.878511000  |
| 33 | 0.750229000  | -0.129516000 | 0.040949000  |
| 9  | 2.476792000  | 0.210017000  | -0.055573000 |
| 15 | -2.535579000 | 0.047366000  | -0.019846000 |
| 1  | 0.384582000  | 1.205997000  | 0.682045000  |
| 1  | 0.424574000  | 0.395376000  | -1.354379000 |

### **PH<sub>3</sub>···GeFH<sub>3</sub>**

|    |              |              |              |
|----|--------------|--------------|--------------|
| 32 | 0.803572000  | -0.003769000 | 0.001163000  |
| 9  | 2.553630000  | 0.010438000  | -0.003093000 |
| 1  | -3.362076000 | 1.213837000  | 0.015052000  |
| 1  | -3.422984000 | -0.599127000 | 1.013712000  |
| 1  | -3.394194000 | -0.557599000 | -1.056653000 |
| 15 | -2.646971000 | -0.000732000 | 0.000854000  |
| 1  | 0.386609000  | 0.780488000  | -1.254112000 |
| 1  | 0.392713000  | 0.688694000  | 1.311027000  |
| 1  | 0.407512000  | -1.488661000 | -0.051217000 |

### **AsH<sub>3</sub>···HF**

|    |              |              |              |
|----|--------------|--------------|--------------|
| 1  | -1.510329000 | -1.188533000 | 0.423062000  |
| 1  | -1.465335000 | 1.004440000  | 0.806847000  |
| 1  | -1.434242000 | 0.239572000  | -1.283097000 |
| 9  | 2.734008000  | 0.000631000  | -0.000281000 |
| 1  | 1.805154000  | -0.014533000 | 0.010130000  |
| 33 | -0.666707000 | -0.001413000 | 0.001381000  |

### **AsH<sub>3</sub>···BrF**

|    |              |              |              |
|----|--------------|--------------|--------------|
| 1  | -2.399369000 | 0.176722000  | 1.297677000  |
| 1  | -2.393243000 | 1.035490000  | -0.807354000 |
| 1  | -2.389488000 | -1.217384000 | -0.498332000 |
| 9  | 2.849903000  | -0.000900000 | -0.001108000 |
| 35 | 1.023073000  | 0.000409000  | 0.000521000  |
| 33 | -1.644684000 | -0.000032000 | -0.000008000 |

### **AsH<sub>3</sub>···SeF<sub>2</sub>**

|    |              |              |              |
|----|--------------|--------------|--------------|
| 9  | 0.941595000  | 1.423160000  | -0.000025000 |
| 9  | 2.931229000  | -0.142394000 | 0.000184000  |
| 1  | -2.961453000 | -0.513384000 | -1.111372000 |
| 1  | -2.959361000 | -0.508904000 | 1.114914000  |
| 1  | -2.527532000 | 1.373097000  | -0.002428000 |
| 34 | 1.197378000  | -0.291432000 | -0.000071000 |
| 33 | -2.033877000 | -0.059667000 | -0.000004000 |

### **AsH<sub>3</sub>···AsF<sub>3</sub>**

|   |             |              |             |
|---|-------------|--------------|-------------|
| 1 | 2.833058000 | -0.994862000 | 0.950484000 |
|---|-------------|--------------|-------------|

|    |              |              |              |
|----|--------------|--------------|--------------|
| 1  | 3.553426000  | -0.002486000 | -0.899205000 |
| 1  | 2.690191000  | 1.211643000  | 0.748680000  |
| 33 | -1.272674000 | 0.000266000  | -0.361171000 |
| 9  | -0.843150000 | 1.239323000  | 0.741634000  |
| 9  | -2.946363000 | 0.050412000  | 0.014500000  |
| 9  | -0.927981000 | -1.291741000 | 0.709824000  |
| 33 | 2.284212000  | -0.006212000 | -0.062876000 |

#### **AsH<sub>3</sub>···GeF<sub>4</sub>**

|    |              |              |              |
|----|--------------|--------------|--------------|
| 32 | 1.188199000  | 0.000123000  | 0.000235000  |
| 9  | 0.719933000  | -0.724726000 | 1.456848000  |
| 9  | 2.884782000  | 0.002208000  | -0.012270000 |
| 9  | 0.698456000  | -0.897474000 | -1.350009000 |
| 9  | 0.703602000  | 1.620160000  | -0.096158000 |
| 33 | -2.240499000 | -0.000782000 | 0.002170000  |
| 1  | -3.068441000 | 0.903173000  | 0.896826000  |
| 1  | -3.068294000 | -1.238259000 | 0.293514000  |
| 1  | -3.010122000 | 0.355455000  | -1.255164000 |

#### **AsH<sub>3</sub>···SeFH**

|    |              |              |              |
|----|--------------|--------------|--------------|
| 9  | 2.993530000  | 0.144870000  | 0.002959000  |
| 1  | -2.633259000 | -0.705153000 | -1.095991000 |
| 1  | -2.619354000 | -0.651363000 | 1.138902000  |
| 1  | -2.768759000 | 1.248403000  | -0.024007000 |
| 34 | 1.236970000  | -0.095028000 | -0.001103000 |
| 33 | -1.876678000 | 0.020909000  | -0.000054000 |
| 1  | 0.952974000  | 1.345222000  | -0.006256000 |

#### **AsH<sub>3</sub>···AsFH<sub>2</sub>**

|    |              |              |              |
|----|--------------|--------------|--------------|
| 1  | 1.003080000  | 0.801138000  | 1.135263000  |
| 1  | 0.996149000  | 0.898393000  | -1.054487000 |
| 33 | -2.015950000 | 0.028645000  | 0.001847000  |
| 33 | 1.370699000  | -0.145630000 | -0.004848000 |
| 9  | 3.087249000  | 0.244840000  | 0.006597000  |
| 1  | -2.805246000 | -0.840378000 | 0.964615000  |
| 1  | -2.900832000 | 1.245049000  | 0.212172000  |
| 1  | -2.785088000 | -0.447275000 | -1.217899000 |

#### **AsH<sub>3</sub>···GeFH<sub>3</sub>**

|    |              |              |              |
|----|--------------|--------------|--------------|
| 32 | -1.453210000 | 0.003978000  | -0.000183000 |
| 9  | -3.201886000 | -0.011069000 | 0.000719000  |
| 33 | 2.110484000  | 0.000593000  | 0.000714000  |
| 1  | 2.954371000  | 0.366224000  | 1.209755000  |
| 1  | 2.945663000  | 0.837660000  | -0.952887000 |

|   |              |              |              |
|---|--------------|--------------|--------------|
| 1 | 2.892155000  | -1.271217000 | -0.279423000 |
| 1 | -1.034428000 | -0.689810000 | -1.307397000 |
| 1 | -1.051714000 | 1.487680000  | 0.050223000  |
| 1 | -1.032320000 | -0.777776000 | 1.255557000  |

### **SbH<sub>3</sub>···HF**

|    |              |              |              |
|----|--------------|--------------|--------------|
| 1  | -1.442437000 | -0.711374000 | -1.227811000 |
| 1  | -1.389542000 | -0.721417000 | 1.259113000  |
| 1  | -1.409536000 | 1.438957000  | 0.024252000  |
| 9  | 3.090490000  | -0.000027000 | 0.000606000  |
| 51 | -0.504623000 | -0.000098000 | -0.000940000 |
| 1  | 2.162880000  | -0.000945000 | -0.013084000 |

### **SbH<sub>3</sub>···BrF**

|    |              |              |              |
|----|--------------|--------------|--------------|
| 1  | 2.275345000  | -0.360244000 | 1.409267000  |
| 1  | 2.252204000  | -1.045439000 | -1.030405000 |
| 1  | 2.252296000  | 1.411435000  | -0.403523000 |
| 9  | -3.238373000 | -0.000061000 | -0.003303000 |
| 35 | -1.408595000 | -0.000008000 | 0.001520000  |
| 51 | 1.405223000  | -0.000097000 | 0.000023000  |

### **SbH<sub>3</sub>···SeF<sub>2</sub>**

|    |              |              |              |
|----|--------------|--------------|--------------|
| 9  | 1.348952000  | 1.411227000  | -0.002517000 |
| 9  | 3.371788000  | -0.116409000 | 0.015641000  |
| 1  | -2.845801000 | -0.321802000 | -1.291746000 |
| 1  | -2.837315000 | -0.673736000 | 1.168497000  |
| 1  | -2.272448000 | 1.566504000  | 0.229563000  |
| 34 | 1.643497000  | -0.297358000 | -0.005863000 |
| 51 | -1.772745000 | -0.041454000 | -0.000492000 |

### **SbH<sub>3</sub>···AsF<sub>3</sub>**

|    |              |              |              |
|----|--------------|--------------|--------------|
| 1  | 2.254990000  | -0.232843000 | 1.624505000  |
| 1  | 3.318005000  | -0.992662000 | -0.489746000 |
| 1  | 2.931996000  | 1.423696000  | -0.096877000 |
| 51 | 2.002759000  | -0.003898000 | -0.042744000 |
| 33 | -1.721110000 | 0.000290000  | -0.366506000 |
| 9  | -1.239308000 | 1.227944000  | 0.728541000  |
| 9  | -3.381562000 | 0.072254000  | 0.053829000  |
| 9  | -1.362362000 | -1.301195000 | 0.688378000  |

### **SbH<sub>3</sub>···GeF<sub>4</sub>**

|    |              |              |              |
|----|--------------|--------------|--------------|
| 32 | -1.624175000 | -0.000130000 | -0.000169000 |
| 9  | -1.126436000 | 1.128290000  | -1.160188000 |
| 9  | -3.318991000 | 0.001045000  | 0.003535000  |
| 9  | -1.126519000 | -1.569087000 | -0.398020000 |

|    |              |              |              |
|----|--------------|--------------|--------------|
| 9  | -1.120993000 | 0.440130000  | 1.555219000  |
| 1  | 2.921493000  | 0.379352000  | 1.397671000  |
| 1  | 2.952145000  | 1.018654000  | -1.003061000 |
| 1  | 2.961454000  | -1.378679000 | -0.356530000 |
| 51 | 2.026960000  | -0.000364000 | -0.000737000 |

### **SbH<sub>3</sub>···SeFH**

|    |              |              |              |
|----|--------------|--------------|--------------|
| 9  | 3.419379000  | 0.103210000  | -0.039120000 |
| 1  | -2.499213000 | 0.609493000  | -1.309841000 |
| 1  | -2.218195000 | -1.560915000 | -0.110940000 |
| 1  | -2.712168000 | 0.519741000  | 1.176808000  |
| 34 | 1.657992000  | -0.078037000 | 0.014753000  |
| 51 | -1.590887000 | 0.015411000  | 0.000584000  |
| 1  | 1.418635000  | 1.370083000  | 0.064636000  |

### **SbH<sub>3</sub>···AsFH<sub>2</sub>**

|    |              |              |              |
|----|--------------|--------------|--------------|
| 1  | 2.772987000  | 1.355352000  | 0.063750000  |
| 1  | 2.571180000  | -0.848474000 | 1.191600000  |
| 1  | 2.553752000  | -0.717201000 | -1.286434000 |
| 51 | 1.717388000  | 0.019786000  | 0.001073000  |
| 33 | -1.834956000 | -0.139204000 | -0.005302000 |
| 9  | -3.554134000 | 0.230617000  | 0.007619000  |
| 1  | -1.469764000 | 0.910115000  | -1.053454000 |
| 1  | -1.474232000 | 0.809304000  | 1.136185000  |

### **SbH<sub>3</sub>···GeFH<sub>3</sub>**

|    |              |              |              |
|----|--------------|--------------|--------------|
| 32 | 1.948326000  | 0.003490000  | 0.004833000  |
| 9  | 3.695363000  | -0.009788000 | -0.013542000 |
| 1  | -2.672040000 | -1.421177000 | -0.358491000 |
| 1  | -2.711150000 | 0.948723000  | -1.086735000 |
| 1  | -2.800629000 | 0.392703000  | 1.326476000  |
| 51 | -1.804089000 | 0.000758000  | 0.001203000  |
| 1  | 1.534719000  | -0.851091000 | 1.214701000  |
| 1  | 1.542003000  | 1.480771000  | 0.145306000  |
| 1  | 1.510959000  | -0.612170000 | -1.335409000 |

### **N(CH<sub>3</sub>)<sub>3</sub>···HF**

|   |              |              |              |
|---|--------------|--------------|--------------|
| 9 | 2.283762000  | -0.004286000 | 0.002955000  |
| 1 | 1.307447000  | -0.004317000 | 0.002634000  |
| 7 | -0.264491000 | -0.000489000 | 0.000354000  |
| 6 | -0.712587000 | -1.338164000 | 0.366498000  |
| 1 | -0.325311000 | -2.060004000 | -0.351975000 |
| 1 | -0.327701000 | -1.592002000 | 1.353663000  |
| 1 | -1.808908000 | -1.405334000 | 0.383265000  |
| 6 | -0.700179000 | 0.353087000  | -1.344874000 |



|   |              |              |              |
|---|--------------|--------------|--------------|
| 1 | -0.304685000 | 1.333450000  | -1.608679000 |
| 1 | -0.314420000 | -0.377594000 | -2.055174000 |
| 1 | -1.795808000 | 0.378672000  | -1.419715000 |
| 6 | -0.704366000 | 0.989737000  | 0.975236000  |
| 1 | -0.320675000 | 0.724925000  | 1.959999000  |
| 1 | -0.309368000 | 1.967744000  | 0.702178000  |
| 1 | -1.800201000 | 1.048501000  | 1.023575000  |

**N(CH<sub>3</sub>)<sub>3</sub>···BrF**

|    |              |              |              |
|----|--------------|--------------|--------------|
| 9  | 2.769963000  | 0.000020000  | -0.000092000 |
| 7  | -1.316050000 | -0.000167000 | -0.000060000 |
| 35 | 0.931878000  | -0.000031000 | 0.000079000  |
| 6  | -1.755794000 | -0.465955000 | 1.312776000  |
| 1  | -1.361985000 | -1.465672000 | 1.488083000  |
| 1  | -1.365825000 | 0.202552000  | 2.078581000  |
| 1  | -2.850067000 | -0.489199000 | 1.371734000  |
| 6  | -1.755668000 | -0.904123000 | -1.059996000 |
| 1  | -1.362096000 | -0.555051000 | -2.013083000 |
| 1  | -1.364546000 | -1.901199000 | -0.864880000 |
| 1  | -2.849890000 | -0.944499000 | -1.109165000 |
| 6  | -1.755473000 | 1.370190000  | -0.253065000 |
| 1  | -1.364836000 | 2.021121000  | 0.527361000  |
| 1  | -1.362468000 | 1.701159000  | -1.212861000 |
| 1  | -2.849739000 | 1.432189000  | -0.265572000 |

**N(CH<sub>3</sub>)<sub>3</sub>···SeF<sub>2</sub>**

|    |              |              |              |
|----|--------------|--------------|--------------|
| 9  | 0.772758000  | 1.440706000  | -0.000030000 |
| 9  | 2.653785000  | -0.151816000 | 0.000657000  |
| 34 | 0.878985000  | -0.308894000 | -0.000443000 |
| 6  | -1.827995000 | 0.667081000  | -1.205214000 |
| 1  | -1.380767000 | 1.659184000  | -1.203345000 |
| 1  | -1.478740000 | 0.124727000  | -2.082873000 |
| 1  | -2.919955000 | 0.758232000  | -1.245331000 |
| 6  | -1.892007000 | -1.421234000 | -0.000084000 |
| 1  | -1.519896000 | -1.933026000 | -0.888577000 |
| 1  | -1.518083000 | -1.933682000 | 0.887296000  |
| 1  | -2.986844000 | -1.459992000 | 0.001064000  |
| 6  | -1.826748000 | 0.666149000  | 1.206248000  |
| 1  | -1.476609000 | 0.123084000  | 2.083155000  |
| 1  | -1.379511000 | 1.658250000  | 1.204743000  |
| 1  | -2.918667000 | 0.757208000  | 1.247500000  |
| 7  | -1.409260000 | -0.046225000 | 0.000013000  |

**N(CH<sub>3</sub>)<sub>3</sub>···AsF<sub>3</sub>**

|    |              |              |              |
|----|--------------|--------------|--------------|
| 33 | -0.888139000 | -0.000022000 | 0.353496000  |
| 9  | -0.703766000 | -1.297071000 | -0.773703000 |
| 9  | -2.615456000 | 0.000035000  | 0.125404000  |
| 9  | -0.703743000 | 1.297069000  | -0.773654000 |
| 7  | 1.549474000  | -0.000014000 | 0.050704000  |
| 6  | 2.021695000  | 1.201950000  | 0.724475000  |
| 1  | 1.623050000  | 2.079672000  | 0.216736000  |
| 1  | 1.670069000  | 1.202782000  | 1.757900000  |
| 1  | 3.117482000  | 1.257130000  | 0.728692000  |
| 6  | 2.021737000  | -1.202355000 | 0.723747000  |
| 1  | 1.669972000  | -1.203876000 | 1.757126000  |
| 1  | 1.623297000  | -2.079829000 | 0.215418000  |
| 1  | 3.117536000  | -1.257383000 | 0.728107000  |
| 6  | 1.924812000  | 0.000457000  | -1.359628000 |
| 1  | 1.511631000  | -0.884092000 | -1.840977000 |
| 1  | 1.510316000  | 0.884576000  | -1.840608000 |
| 1  | 3.016137000  | 0.001244000  | -1.476670000 |

**N(CH<sub>3</sub>)<sub>3</sub>···GeF<sub>4</sub>**

|    |              |              |              |
|----|--------------|--------------|--------------|
| 32 | -0.738474000 | 0.000949000  | -0.000128000 |
| 9  | -0.576459000 | 1.722563000  | 0.048497000  |
| 9  | -2.462744000 | 0.001969000  | 0.000856000  |
| 9  | -0.578388000 | -0.820545000 | -1.513873000 |
| 9  | -0.575959000 | -0.905431000 | 1.464385000  |
| 7  | 1.377022000  | 0.000275000  | -0.000220000 |
| 6  | 1.878655000  | 0.726810000  | -1.186212000 |
| 1  | 1.513974000  | 0.237475000  | -2.086152000 |
| 1  | 1.518051000  | 1.752086000  | -1.155685000 |
| 1  | 2.971541000  | 0.720886000  | -1.181306000 |
| 6  | 1.872227000  | -1.392270000 | -0.036510000 |
| 1  | 1.504988000  | -1.923735000 | 0.838142000  |
| 1  | 1.507557000  | -1.876493000 | -0.939255000 |
| 1  | 2.965096000  | -1.390288000 | -0.035007000 |
| 6  | 1.875847000  | 0.663405000  | 1.223409000  |
| 1  | 1.513057000  | 1.688192000  | 1.247025000  |
| 1  | 1.510607000  | 0.125725000  | 2.095188000  |
| 1  | 2.968720000  | 0.659188000  | 1.219768000  |

**N(CH<sub>3</sub>)<sub>3</sub>···SeFH**

|    |              |              |              |
|----|--------------|--------------|--------------|
| 9  | -2.776022000 | -0.163106000 | 0.000442000  |
| 34 | -0.984276000 | 0.105912000  | -0.000139000 |
| 7  | 1.360146000  | -0.025687000 | 0.000049000  |
| 1  | -0.776109000 | -1.345670000 | 0.000548000  |
| 6  | 1.810521000  | -0.710523000 | 1.207179000  |

|   |             |              |              |
|---|-------------|--------------|--------------|
| 1 | 1.422010000 | -0.191505000 | 2.082169000  |
| 1 | 1.426138000 | -1.730384000 | 1.210363000  |
| 1 | 2.906243000 | -0.744315000 | 1.259713000  |
| 6 | 1.810068000 | -0.722644000 | -1.200271000 |
| 1 | 1.426086000 | -1.742653000 | -1.192636000 |
| 1 | 1.420804000 | -0.212857000 | -2.080316000 |
| 1 | 2.905760000 | -0.756684000 | -1.253137000 |
| 6 | 1.796160000 | 1.366417000  | -0.006934000 |
| 1 | 1.404105000 | 1.860590000  | -0.895642000 |
| 1 | 1.402825000 | 1.869914000  | 0.875998000  |
| 1 | 2.890212000 | 1.440839000  | -0.006482000 |

**N(CH<sub>3</sub>)<sub>3</sub>···AsFH<sub>2</sub>**

|    |              |              |              |
|----|--------------|--------------|--------------|
| 33 | -1.058333000 | -0.137954000 | 0.002235000  |
| 1  | -0.784937000 | 0.850793000  | -1.127760000 |
| 9  | -2.812680000 | 0.212820000  | -0.003584000 |
| 1  | -0.785182000 | 0.887253000  | 1.099798000  |
| 7  | 1.437038000  | 0.030538000  | -0.000571000 |
| 6  | 1.873450000  | -0.646225000 | 1.212137000  |
| 1  | 1.491894000  | -0.113049000 | 2.083430000  |
| 1  | 1.474776000  | -1.660708000 | 1.224637000  |
| 1  | 2.968678000  | -0.692685000 | 1.278676000  |
| 6  | 1.873838000  | -0.689071000 | -1.188209000 |
| 1  | 1.475882000  | -1.703621000 | -1.164112000 |
| 1  | 1.491743000  | -0.187877000 | -2.078077000 |
| 1  | 2.969094000  | -0.737100000 | -1.253159000 |
| 6  | 1.895422000  | 1.412129000  | -0.025038000 |
| 1  | 1.515703000  | 1.906503000  | -0.918994000 |
| 1  | 1.513349000  | 1.938320000  | 0.849509000  |
| 1  | 2.992576000  | 1.474524000  | -0.024801000 |

**N(CH<sub>3</sub>)<sub>3</sub>···GeFH<sub>3</sub>**

|    |              |              |              |
|----|--------------|--------------|--------------|
| 32 | -0.738474000 | 0.000949000  | -0.000128000 |
| 9  | -0.576459000 | 1.722563000  | 0.048497000  |
| 9  | -2.462744000 | 0.001969000  | 0.000856000  |
| 9  | -0.578388000 | -0.820545000 | -1.513873000 |
| 9  | -0.575959000 | -0.905431000 | 1.464385000  |
| 7  | 1.377022000  | 0.000275000  | -0.000220000 |
| 6  | 1.878655000  | 0.726810000  | -1.186212000 |
| 1  | 1.513974000  | 0.237475000  | -2.086152000 |
| 1  | 1.518051000  | 1.752086000  | -1.155685000 |
| 1  | 2.971541000  | 0.720886000  | -1.181306000 |
| 6  | 1.872227000  | -1.392270000 | -0.036510000 |
| 1  | 1.504988000  | -1.923735000 | 0.838142000  |
| 1  | 1.507557000  | -1.876493000 | -0.939255000 |

|   |             |              |              |
|---|-------------|--------------|--------------|
| 1 | 2.965096000 | -1.390288000 | -0.035007000 |
| 6 | 1.875847000 | 0.663405000  | 1.223409000  |
| 1 | 1.513057000 | 1.688192000  | 1.247025000  |
| 1 | 1.510607000 | 0.125725000  | 2.095188000  |
| 1 | 2.968720000 | 0.659188000  | 1.219768000  |

**P(CH<sub>3</sub>)<sub>3</sub>···HF**

|    |              |              |              |
|----|--------------|--------------|--------------|
| 9  | 3.053129000  | -0.010842000 | 0.004129000  |
| 1  | 2.111840000  | -0.015656000 | 0.006698000  |
| 15 | -0.126934000 | -0.005880000 | 0.001934000  |
| 6  | -0.953974000 | 0.780523000  | -1.434338000 |
| 1  | -0.637508000 | 1.820906000  | -1.513797000 |
| 1  | -0.662459000 | 0.269086000  | -2.351867000 |
| 1  | -2.040376000 | 0.744329000  | -1.333354000 |
| 6  | -0.966879000 | 0.861824000  | 1.383088000  |
| 1  | -0.682747000 | 0.402312000  | 2.330067000  |
| 1  | -0.649617000 | 1.904276000  | 1.403683000  |
| 1  | -2.052862000 | 0.819282000  | 1.276659000  |
| 6  | -0.992655000 | -1.622500000 | 0.044206000  |
| 1  | -0.702526000 | -2.214604000 | -0.824118000 |
| 1  | -0.700166000 | -2.170836000 | 0.939780000  |
| 1  | -2.076673000 | -1.492400000 | 0.042349000  |

**P(CH<sub>3</sub>)<sub>3</sub>···BrF**

|    |              |              |              |
|----|--------------|--------------|--------------|
| 9  | -3.117460000 | -0.000171000 | -0.000089000 |
| 15 | 1.147482000  | 0.000431000  | 0.000167000  |
| 35 | -1.159821000 | 0.000653000  | 0.000526000  |
| 6  | 1.858104000  | -1.129242000 | -1.225205000 |
| 1  | 1.505793000  | -2.139234000 | -1.017919000 |
| 1  | 1.510286000  | -0.839131000 | -2.216230000 |
| 1  | 2.948355000  | -1.107039000 | -1.197657000 |
| 6  | 1.862941000  | -0.497294000 | 1.588418000  |
| 1  | 1.515612000  | 0.187627000  | 2.361412000  |
| 1  | 1.512386000  | -1.499356000 | 1.834085000  |
| 1  | 2.953044000  | -0.487771000 | 1.551864000  |
| 6  | 1.863652000  | 1.623768000  | -0.365384000 |
| 1  | 1.517663000  | 1.949017000  | -1.346104000 |
| 1  | 1.513596000  | 2.339213000  | 0.378167000  |
| 1  | 2.953736000  | 1.585492000  | -0.354715000 |

**P(CH<sub>3</sub>)<sub>3</sub>···SeF<sub>2</sub>**

|    |              |              |              |
|----|--------------|--------------|--------------|
| 9  | 0.976502000  | 1.365447000  | 0.000214000  |
| 9  | 2.956925000  | -0.009520000 | 0.000131000  |
| 15 | -1.309727000 | -0.068986000 | -0.000053000 |
| 34 | 1.188473000  | -0.399820000 | -0.000132000 |

|   |              |              |              |
|---|--------------|--------------|--------------|
| 6 | -1.872223000 | 0.896484000  | -1.433168000 |
| 1 | -1.300373000 | 1.823592000  | -1.461426000 |
| 1 | -1.665760000 | 0.337144000  | -2.345068000 |
| 1 | -2.938019000 | 1.121392000  | -1.373102000 |
| 6 | -2.363465000 | -1.554554000 | 0.001489000  |
| 1 | -2.147328000 | -2.153389000 | -0.883065000 |
| 1 | -2.146538000 | -2.152104000 | 0.886728000  |
| 1 | -3.420651000 | -1.284389000 | 0.001869000  |
| 6 | -1.871496000 | 0.898618000  | 1.431897000  |
| 1 | -1.664951000 | 0.340399000  | 2.344472000  |
| 1 | -1.299081000 | 1.825455000  | 1.458530000  |
| 1 | -2.937211000 | 1.123944000  | 1.371938000  |

**P(CH<sub>3</sub>)<sub>3</sub>···AsF<sub>3</sub>**

|    |              |              |              |
|----|--------------|--------------|--------------|
| 33 | -1.437060000 | 0.011286000  | 0.440398000  |
| 9  | -1.116041000 | -1.370394000 | -0.531554000 |
| 9  | -3.091671000 | 0.088960000  | -0.048651000 |
| 9  | -0.940538000 | 1.164632000  | -0.742825000 |
| 6  | 2.398085000  | 1.659325000  | -0.030126000 |
| 1  | 1.670070000  | 2.245098000  | -0.591675000 |
| 1  | 2.552657000  | 2.140221000  | 0.935860000  |
| 1  | 3.343661000  | 1.642873000  | -0.575486000 |
| 6  | 3.187887000  | -0.870622000 | 0.958752000  |
| 1  | 3.361526000  | -0.484462000 | 1.963111000  |
| 1  | 2.992163000  | -1.940059000 | 1.035937000  |
| 1  | 4.085778000  | -0.715899000 | 0.357345000  |
| 6  | 1.804667000  | -0.672426000 | -1.500455000 |
| 1  | 1.550853000  | -1.732273000 | -1.502366000 |
| 1  | 1.060259000  | -0.150985000 | -2.102551000 |
| 1  | 2.793524000  | -0.532128000 | -1.940844000 |
| 15 | 1.733526000  | -0.032751000 | 0.215051000  |

**P(CH<sub>3</sub>)<sub>3</sub>···GeF<sub>4</sub>**

|    |              |              |              |
|----|--------------|--------------|--------------|
| 32 | -1.024473000 | 0.000076000  | 0.000230000  |
| 9  | -0.852841000 | 0.863938000  | -1.502056000 |
| 9  | -2.746719000 | -0.000536000 | -0.000688000 |
| 9  | -0.852644000 | -1.732771000 | 0.003345000  |
| 9  | -0.854474000 | 0.869375000  | 1.499508000  |
| 6  | 2.137735000  | -0.838621000 | -1.446699000 |
| 1  | 1.781500000  | -1.868412000 | -1.459116000 |
| 1  | 1.782575000  | -0.336544000 | -2.346300000 |
| 1  | 3.227680000  | -0.826262000 | -1.423866000 |
| 6  | 2.140485000  | -0.833516000 | 1.448825000  |
| 1  | 1.788240000  | -0.327741000 | 2.347491000  |

|    |             |              |              |
|----|-------------|--------------|--------------|
| 1  | 1.783526000 | -1.862985000 | 1.466232000  |
| 1  | 3.230373000 | -0.822014000 | 1.423011000  |
| 6  | 2.140072000 | 1.671703000  | -0.003425000 |
| 1  | 1.784722000 | 2.197201000  | -0.889497000 |
| 1  | 1.785666000 | 2.201005000  | 0.880713000  |
| 1  | 3.229983000 | 1.644164000  | -0.003916000 |
| 15 | 1.442614000 | 0.000113000  | 0.000314000  |

**P(CH<sub>3</sub>)<sub>3</sub>···SeFH**

|    |              |              |              |
|----|--------------|--------------|--------------|
| 9  | -3.136985000 | -0.150503000 | 0.000051000  |
| 34 | -1.290000000 | 0.059232000  | 0.000018000  |
| 1  | -1.164655000 | -1.399588000 | -0.000043000 |
| 6  | 2.095822000  | -0.770345000 | 1.429745000  |
| 1  | 1.706013000  | -0.323028000 | 2.343719000  |
| 1  | 1.903427000  | -1.842530000 | 1.466267000  |
| 1  | 3.172072000  | -0.600172000 | 1.369136000  |
| 6  | 2.095644000  | -0.771302000 | -1.429262000 |
| 1  | 1.904948000  | -1.843860000 | -1.463745000 |
| 1  | 1.704266000  | -0.326199000 | -2.343641000 |
| 1  | 3.171672000  | -0.599313000 | -1.369981000 |
| 6  | 1.768688000  | 1.687593000  | -0.000591000 |
| 1  | 1.370047000  | 2.183746000  | -0.885590000 |
| 1  | 1.366617000  | 2.185442000  | 0.881895000  |
| 1  | 2.856386000  | 1.767699000  | 0.001428000  |
| 15 | 1.222742000  | -0.049148000 | 0.000010000  |

**P(CH<sub>3</sub>)<sub>3</sub>···AsFH<sub>2</sub>**

|    |              |              |              |
|----|--------------|--------------|--------------|
| 33 | -1.505377000 | 0.025455000  | -0.010190000 |
| 1  | -1.344920000 | 0.930189000  | 1.204594000  |
| 9  | -3.284519000 | -0.037795000 | 0.106747000  |
| 1  | -1.294620000 | -1.247631000 | 0.801320000  |
| 6  | 1.869902000  | -1.329716000 | -1.046247000 |
| 1  | 1.710724000  | -2.301682000 | -0.578619000 |
| 1  | 1.224737000  | -1.266311000 | -1.923110000 |
| 1  | 2.912013000  | -1.250764000 | -1.360892000 |
| 6  | 1.977219000  | 1.479899000  | -0.788860000 |
| 1  | 1.333343000  | 1.626206000  | -1.656590000 |
| 1  | 1.892060000  | 2.360454000  | -0.151819000 |
| 1  | 3.011738000  | 1.378571000  | -1.121721000 |
| 6  | 2.746516000  | -0.167533000 | 1.380476000  |
| 1  | 2.683105000  | 0.655453000  | 2.092106000  |
| 1  | 2.616515000  | -1.100005000 | 1.929450000  |
| 1  | 3.733628000  | -0.161767000 | 0.914187000  |
| 15 | 1.413197000  | -0.001231000 | 0.130296000  |

**P(CH<sub>3</sub>)<sub>3</sub>···GeFH<sub>3</sub>**

|    |              |              |              |
|----|--------------|--------------|--------------|
| 32 | -1.690360000 | 0.005914000  | 0.128879000  |
| 9  | -3.429001000 | -0.012362000 | -0.126290000 |
| 1  | -1.492886000 | -0.675825000 | 1.489879000  |
| 1  | -1.131133000 | -0.791207000 | -1.064893000 |
| 1  | -1.314797000 | 1.496840000  | 0.099264000  |
| 6  | 1.888765000  | 1.069375000  | -1.313646000 |
| 1  | 1.210869000  | 0.783644000  | -2.119299000 |
| 1  | 1.685518000  | 2.109559000  | -1.057131000 |
| 1  | 2.917858000  | 0.982712000  | -1.668287000 |
| 6  | 2.980588000  | 0.513033000  | 1.223597000  |
| 1  | 2.823327000  | 1.535730000  | 1.566710000  |
| 1  | 3.024428000  | -0.133070000 | 2.100474000  |
| 1  | 3.932397000  | 0.457835000  | 0.691450000  |
| 6  | 2.225791000  | -1.596423000 | -0.485077000 |
| 1  | 2.265792000  | -2.324133000 | 0.325721000  |
| 1  | 1.550985000  | -1.981089000 | -1.250574000 |
| 1  | 3.223869000  | -1.484083000 | -0.913372000 |
| 15 | 1.579030000  | 0.001945000  | 0.150886000  |

**As(CH<sub>3</sub>)<sub>3</sub>···HF**

|    |              |              |              |
|----|--------------|--------------|--------------|
| 9  | -3.244763000 | 0.004465000  | 0.002480000  |
| 1  | -2.308936000 | 0.005629000  | 0.004791000  |
| 33 | 0.069788000  | 0.001942000  | 0.001393000  |
| 6  | 1.020857000  | -1.263934000 | 1.157519000  |
| 1  | 0.747373000  | -1.084167000 | 2.196011000  |
| 1  | 0.735004000  | -2.281136000 | 0.894576000  |
| 1  | 2.098441000  | -1.148328000 | 1.040850000  |
| 6  | 1.015877000  | -0.378606000 | -1.673277000 |
| 1  | 0.730141000  | -1.364653000 | -2.035824000 |
| 1  | 0.738572000  | 0.360038000  | -2.423633000 |
| 1  | 2.093767000  | -0.348450000 | -1.515226000 |
| 6  | 1.035433000  | 1.631441000  | 0.508326000  |
| 1  | 0.755147000  | 2.443284000  | -0.160820000 |
| 1  | 0.765819000  | 1.911721000  | 1.525307000  |
| 1  | 2.111518000  | 1.468384000  | 0.450273000  |

**As(CH<sub>3</sub>)<sub>3</sub>···BrF**

|    |              |              |              |
|----|--------------|--------------|--------------|
| 9  | 3.410219000  | 0.000614000  | 0.000315000  |
| 35 | 1.494727000  | -0.000670000 | -0.000510000 |
| 33 | -0.988921000 | -0.000371000 | -0.000186000 |
| 6  | -1.814396000 | 0.808307000  | 1.559985000  |
| 1  | -1.489050000 | 0.272450000  | 2.449563000  |
| 1  | -1.489137000 | 1.844164000  | 1.633782000  |
| 1  | -2.900046000 | 0.766019000  | 1.478376000  |

|   |              |              |              |
|---|--------------|--------------|--------------|
| 6 | -1.817605000 | 0.948404000  | -1.477701000 |
| 1 | -1.491195000 | 1.986356000  | -1.457384000 |
| 1 | -1.494880000 | 0.495836000  | -2.413331000 |
| 1 | -2.903089000 | 0.899870000  | -1.397446000 |
| 6 | -1.819598000 | -1.753710000 | -0.080154000 |
| 1 | -1.494745000 | -2.256980000 | -0.988767000 |
| 1 | -1.496277000 | -2.336434000 | 0.780232000  |
| 1 | -2.905007000 | -1.659135000 | -0.076655000 |

**As(CH<sub>3</sub>)<sub>3</sub>···SeF<sub>2</sub>**

|    |              |              |              |
|----|--------------|--------------|--------------|
| 9  | 1.393241000  | 1.372209000  | -0.000302000 |
| 9  | 3.363125000  | -0.103289000 | 0.000018000  |
| 34 | 1.603127000  | -0.368787000 | 0.000093000  |
| 6  | -1.642627000 | 1.812988000  | -0.005679000 |
| 1  | -1.207243000 | 2.275690000  | 0.877771000  |
| 1  | -1.198849000 | 2.272850000  | -0.886386000 |
| 1  | -2.722603000 | 1.956207000  | -0.010871000 |
| 6  | -2.296823000 | -0.712508000 | -1.496382000 |
| 1  | -1.886961000 | -0.319161000 | -2.424894000 |
| 1  | -2.273293000 | -1.800084000 | -1.536143000 |
| 1  | -3.326360000 | -0.374785000 | -1.379057000 |
| 6  | -2.294451000 | -0.702661000 | 1.502137000  |
| 1  | -2.270280000 | -1.789940000 | 1.549314000  |
| 1  | -1.883288000 | -0.302833000 | 2.427286000  |
| 1  | -3.324369000 | -0.366303000 | 1.384154000  |
| 33 | -1.206574000 | -0.085456000 | -0.000067000 |

**As(CH<sub>3</sub>)<sub>3</sub>···AsF<sub>3</sub>**

|    |              |              |              |
|----|--------------|--------------|--------------|
| 33 | 1.807242000  | 0.013463000  | -0.440604000 |
| 9  | 1.448970000  | -1.369432000 | 0.511551000  |
| 9  | 3.442106000  | 0.100092000  | 0.090716000  |
| 9  | 1.253214000  | 1.154962000  | 0.724026000  |
| 6  | -2.228709000 | 1.758128000  | 0.218246000  |
| 1  | -1.449466000 | 2.312175000  | 0.739677000  |
| 1  | -2.485852000 | 2.290010000  | -0.696439000 |
| 1  | -3.110610000 | 1.684675000  | 0.854523000  |
| 6  | -3.229170000 | -0.841194000 | -0.824866000 |
| 1  | -3.519000000 | -0.411939000 | -1.782623000 |
| 1  | -3.090124000 | -1.913570000 | -0.952388000 |
| 1  | -4.019106000 | -0.663891000 | -0.095139000 |
| 6  | -1.509647000 | -0.758841000 | 1.600690000  |
| 1  | -1.281345000 | -1.822539000 | 1.560063000  |
| 1  | -0.721086000 | -0.260296000 | 2.162477000  |
| 1  | -2.468736000 | -0.604846000 | 2.094930000  |
| 33 | -1.545065000 | -0.029491000 | -0.219582000 |



**As(CH<sub>3</sub>)<sub>3</sub>···GeF<sub>4</sub>**

|    |              |              |              |
|----|--------------|--------------|--------------|
| 32 | -1.334834000 | -0.000171000 | 0.000128000  |
| 9  | -1.133565000 | -0.062863000 | -1.718304000 |
| 9  | -3.054758000 | -0.000698000 | 0.003598000  |
| 9  | -1.129639000 | -1.459628000 | 0.910023000  |
| 9  | -1.132491000 | 1.521145000  | 0.803037000  |
| 6  | 2.108049000  | -1.555501000 | -0.821706000 |
| 1  | 1.777592000  | -2.446691000 | -0.291192000 |
| 1  | 1.777728000  | -1.617039000 | -1.857088000 |
| 1  | 3.193752000  | -1.480802000 | -0.782063000 |
| 6  | 2.106133000  | 0.067741000  | 1.760235000  |
| 1  | 1.765299000  | 0.967741000  | 2.268823000  |
| 1  | 1.783788000  | -0.803386000 | 2.327900000  |
| 1  | 3.192047000  | 0.076072000  | 1.678442000  |
| 6  | 2.104656000  | 1.489965000  | -0.938589000 |
| 1  | 1.770419000  | 1.474154000  | -1.974430000 |
| 1  | 1.775074000  | 2.417589000  | -0.474178000 |
| 1  | 3.190689000  | 1.419471000  | -0.897937000 |
| 33 | 1.291799000  | 0.000107000  | 0.000388000  |

**As(CH<sub>3</sub>)<sub>3</sub>···SeFH**

|    |              |              |              |
|----|--------------|--------------|--------------|
| 6  | 2.132800000  | 0.788409000  | -1.467212000 |
| 1  | 1.723935000  | 0.428586000  | -2.409619000 |
| 1  | 2.082003000  | 1.875613000  | -1.455664000 |
| 1  | 3.170888000  | 0.471019000  | -1.371861000 |
| 6  | 1.549433000  | -1.817521000 | -0.096239000 |
| 1  | 1.132519000  | -2.337477000 | 0.764797000  |
| 1  | 1.124025000  | -2.245662000 | -1.002481000 |
| 1  | 2.632045000  | -1.937076000 | -0.107611000 |
| 6  | 2.142669000  | 0.630347000  | 1.536394000  |
| 1  | 2.094096000  | 1.712954000  | 1.637988000  |
| 1  | 1.738535000  | 0.175256000  | 2.438793000  |
| 1  | 3.179511000  | 0.322959000  | 1.402412000  |
| 9  | -3.472692000 | 0.120372000  | 0.005593000  |
| 33 | 1.064395000  | 0.069086000  | 0.004330000  |
| 1  | -1.523736000 | 1.430850000  | 0.080521000  |
| 34 | -1.652178000 | -0.025518000 | -0.000240000 |

**As(CH<sub>3</sub>)<sub>3</sub>···AsFH<sub>2</sub>**

|    |              |              |              |
|----|--------------|--------------|--------------|
| 33 | 1.895662000  | 0.025755000  | 0.006007000  |
| 1  | 1.725425000  | 0.914977000  | -1.219738000 |
| 9  | 3.663977000  | -0.039746000 | -0.098599000 |
| 1  | 1.670588000  | -1.248705000 | -0.800275000 |
| 6  | -1.691586000 | -1.383717000 | 1.175019000  |

|    |              |              |              |
|----|--------------|--------------|--------------|
| 1  | -1.585377000 | -2.368045000 | 0.721476000  |
| 1  | -1.004958000 | -1.313466000 | 2.017727000  |
| 1  | -2.714632000 | -1.255904000 | 1.528184000  |
| 6  | -1.829682000 | 1.562601000  | 0.883698000  |
| 1  | -1.143875000 | 1.725274000  | 1.714089000  |
| 1  | -1.817151000 | 2.444174000  | 0.244663000  |
| 1  | -2.837462000 | 1.408612000  | 1.268890000  |
| 6  | -2.794173000 | -0.191588000 | -1.317033000 |
| 1  | -2.807975000 | 0.625366000  | -2.036508000 |
| 1  | -2.726011000 | -1.132473000 | -1.860545000 |
| 1  | -3.713936000 | -0.175870000 | -0.732515000 |
| 33 | -1.232867000 | -0.001209000 | -0.139588000 |

**As(CH<sub>3</sub>)<sub>3</sub>···GeFH<sub>3</sub>**

|    |              |              |              |
|----|--------------|--------------|--------------|
| 32 | -2.065816000 | 0.007640000  | -0.132041000 |
| 9  | -3.798599000 | -0.013879000 | 0.135772000  |
| 1  | -1.878631000 | -0.439968000 | -1.588332000 |
| 1  | -1.640294000 | 1.460429000  | 0.139850000  |
| 1  | -1.498858000 | -0.986128000 | 0.899959000  |
| 6  | 1.538575000  | 0.906948000  | 1.577307000  |
| 1  | 1.300577000  | 1.963902000  | 1.465406000  |
| 1  | 0.839340000  | 0.469211000  | 2.289228000  |
| 1  | 2.554288000  | 0.802295000  | 1.958624000  |
| 6  | 2.144996000  | -1.716642000 | 0.356913000  |
| 1  | 1.465320000  | -2.239941000 | 1.028331000  |
| 1  | 2.296221000  | -2.330118000 | -0.529904000 |
| 1  | 3.100622000  | -1.562460000 | 0.857892000  |
| 6  | 2.923215000  | 0.780343000  | -1.040560000 |
| 1  | 3.100896000  | 0.267691000  | -1.984564000 |
| 1  | 2.741254000  | 1.833819000  | -1.247096000 |
| 1  | 3.802831000  | 0.682805000  | -0.404437000 |
| 33 | 1.347552000  | 0.004090000  | -0.158895000 |

**Sb(CH<sub>3</sub>)<sub>3</sub>···HF**

|    |              |              |              |
|----|--------------|--------------|--------------|
| 9  | -3.501092000 | 0.001238000  | -0.001667000 |
| 51 | 0.034434000  | 0.000626000  | -0.000756000 |
| 1  | -2.569157000 | 0.002151000  | -0.002263000 |
| 6  | 1.136210000  | -1.022744000 | -1.538491000 |
| 1  | 0.882668000  | -2.081555000 | -1.535575000 |
| 1  | 0.886239000  | -0.608107000 | -2.513667000 |
| 1  | 2.205074000  | -0.908254000 | -1.362121000 |
| 6  | 1.138211000  | 1.843194000  | -0.112185000 |
| 1  | 0.889303000  | 2.370789000  | -1.031460000 |
| 1  | 0.884937000  | 2.480161000  | 0.733684000  |
| 1  | 2.206868000  | 1.632305000  | -0.096452000 |
| 6  | 1.128855000  | -0.825080000 | 1.656423000  |

|   |             |              |             |
|---|-------------|--------------|-------------|
| 1 | 0.876167000 | -0.292074000 | 2.571528000 |
| 1 | 0.873334000 | -1.875682000 | 1.784231000 |
| 1 | 2.198574000 | -0.734996000 | 1.471185000 |

**Sb(CH<sub>3</sub>)<sub>3</sub>···BrF**

|    |              |              |              |
|----|--------------|--------------|--------------|
| 9  | -3.697469000 | -0.000509000 | -0.000242000 |
| 35 | -1.799769000 | 0.000681000  | 0.000269000  |
| 51 | 0.874151000  | 0.000326000  | 0.000207000  |
| 6  | 1.857511000  | -0.403658000 | -1.851912000 |
| 1  | 1.560061000  | -1.385454000 | -2.214763000 |
| 1  | 1.570489000  | 0.345635000  | -2.586949000 |
| 1  | 2.936736000  | -0.378986000 | -1.706888000 |
| 6  | 1.857965000  | -1.403664000 | 1.273490000  |
| 1  | 1.566748000  | -1.224104000 | 2.306454000  |
| 1  | 1.565064000  | -2.414025000 | 0.995167000  |
| 1  | 2.937137000  | -1.295222000 | 1.173661000  |
| 6  | 1.862336000  | 1.803623000  | 0.576625000  |
| 1  | 1.569565000  | 2.608844000  | -0.094170000 |
| 1  | 1.573587000  | 2.067981000  | 1.591917000  |
| 1  | 2.941163000  | 1.661636000  | 0.528552000  |

**Sb(CH<sub>3</sub>)<sub>3</sub>···SeF<sub>2</sub>**

|    |              |              |              |
|----|--------------|--------------|--------------|
| 9  | -1.532716000 | -1.294359000 | 0.000190000  |
| 9  | -3.652218000 | -0.007799000 | 0.000093000  |
| 34 | -1.939989000 | 0.413320000  | -0.000099000 |
| 6  | 1.606214000  | -1.169978000 | -1.611963000 |
| 1  | 0.854377000  | -1.955182000 | -1.669936000 |
| 1  | 1.617618000  | -0.622664000 | -2.552756000 |
| 1  | 2.585884000  | -1.613313000 | -1.438179000 |
| 6  | 2.900895000  | 1.326753000  | 0.000736000  |
| 1  | 2.933222000  | 1.959522000  | -0.884263000 |
| 1  | 2.932991000  | 1.958493000  | 0.886480000  |
| 1  | 3.763943000  | 0.661858000  | 0.000468000  |
| 6  | 1.605386000  | -1.170596000 | 1.611603000  |
| 1  | 1.616347000  | -0.623585000 | 2.552575000  |
| 1  | 0.853494000  | -1.955798000 | 1.668909000  |
| 1  | 2.585109000  | -1.613938000 | 1.438144000  |
| 51 | 1.102080000  | 0.148119000  | -0.000056000 |

**Sb(CH<sub>3</sub>)<sub>3</sub>···AsF<sub>3</sub>**

|    |              |              |              |
|----|--------------|--------------|--------------|
| 33 | 2.170993000  | 0.019950000  | -0.445454000 |
| 9  | 1.771259000  | -1.388080000 | 0.447093000  |
| 9  | 3.759926000  | 0.135962000  | 0.192090000  |
| 9  | 1.498730000  | 1.118996000  | 0.695781000  |
| 6  | -2.051495000 | 1.908394000  | 0.461476000  |

|    |              |              |              |
|----|--------------|--------------|--------------|
| 1  | -1.203681000 | 2.404648000  | 0.931670000  |
| 1  | -2.399981000 | 2.518710000  | -0.370190000 |
| 1  | -2.855095000 | 1.799869000  | 1.189139000  |
| 6  | -3.415458000 | -0.764907000 | -0.663341000 |
| 1  | -3.816563000 | -0.265962000 | -1.544283000 |
| 1  | -3.385117000 | -1.836559000 | -0.853872000 |
| 1  | -4.067874000 | -0.570435000 | 0.187314000  |
| 6  | -1.266342000 | -0.915649000 | 1.717265000  |
| 1  | -1.104988000 | -1.988821000 | 1.629997000  |
| 1  | -0.412057000 | -0.478949000 | 2.232474000  |
| 1  | -2.174120000 | -0.727599000 | 2.289544000  |
| 51 | -1.433191000 | -0.032984000 | -0.237233000 |

### **Sb(CH<sub>3</sub>)<sub>3</sub>···GeF<sub>4</sub>**

|    |              |              |              |
|----|--------------|--------------|--------------|
| 32 | -1.997489000 | -0.001831000 | -0.000208000 |
| 9  | -3.698628000 | 0.009923000  | 0.000971000  |
| 6  | 2.514528000  | -1.839700000 | -0.056884000 |
| 1  | 2.266651000  | -2.450995000 | 0.809212000  |
| 1  | 2.266977000  | -2.396561000 | -0.959043000 |
| 1  | 3.581336000  | -1.619210000 | -0.050077000 |
| 6  | 2.472259000  | 0.990569000  | -1.572324000 |
| 1  | 2.227951000  | 0.539523000  | -2.532584000 |
| 1  | 2.196543000  | 2.043374000  | -1.601174000 |
| 1  | 3.543570000  | 0.903331000  | -1.394985000 |
| 6  | 2.466478000  | 0.888269000  | 1.635081000  |
| 1  | 2.190585000  | 1.937211000  | 1.729316000  |
| 1  | 2.217753000  | 0.377471000  | 2.563784000  |
| 1  | 3.538523000  | 0.811917000  | 1.457154000  |
| 51 | 1.395469000  | -0.005309000 | -0.000825000 |
| 9  | -1.586260000 | -0.874314000 | 1.397382000  |
| 9  | -1.587785000 | -0.782803000 | -1.451567000 |
| 9  | -1.571632000 | 1.641470000  | 0.052314000  |

### **Sb(CH<sub>3</sub>)<sub>3</sub>···SeFH**

|   |              |              |              |
|---|--------------|--------------|--------------|
| 9 | 3.801072000  | -0.086107000 | 0.045422000  |
| 6 | -2.229679000 | 0.251722000  | 1.741980000  |
| 1 | -2.272720000 | -0.650579000 | 2.349350000  |
| 1 | -1.832560000 | 1.063803000  | 2.348282000  |
| 1 | -3.233445000 | 0.507632000  | 1.404786000  |
| 6 | -1.465369000 | 1.712645000  | -1.037208000 |
| 1 | -1.047475000 | 2.579880000  | -0.528421000 |
| 1 | -1.049454000 | 1.664122000  | -2.042261000 |
| 1 | -2.547801000 | 1.816755000  | -1.098208000 |
| 6 | -2.247442000 | -1.423500000 | -1.019147000 |
| 1 | -1.861231000 | -1.587211000 | -2.023543000 |

|    |              |              |              |
|----|--------------|--------------|--------------|
| 1  | -2.290311000 | -2.379385000 | -0.500142000 |
| 1  | -3.249318000 | -1.000289000 | -1.080643000 |
| 1  | 1.867487000  | -1.257650000 | 0.721315000  |
| 51 | -0.959260000 | -0.069679000 | 0.040060000  |
| 34 | 1.996600000  | 0.009597000  | -0.003415000 |

**Sb(CH<sub>3</sub>)<sub>3</sub>···AsFH<sub>2</sub>**

|    |              |              |              |
|----|--------------|--------------|--------------|
| 33 | -2.297424000 | 0.010480000  | -0.041868000 |
| 1  | -2.060954000 | 1.029327000  | 1.068558000  |
| 9  | -4.054573000 | -0.017215000 | 0.133593000  |
| 1  | -2.043859000 | -1.162244000 | 0.900677000  |
| 6  | 1.806832000  | -1.516350000 | -1.250356000 |
| 1  | 1.713629000  | -2.500321000 | -0.793353000 |
| 1  | 1.208479000  | -1.497376000 | -2.160044000 |
| 1  | 2.851100000  | -1.334995000 | -1.502460000 |
| 6  | 1.894742000  | 1.668563000  | -0.999601000 |
| 1  | 1.308285000  | 1.817091000  | -1.905072000 |
| 1  | 1.842898000  | 2.575267000  | -0.398930000 |
| 1  | 2.932269000  | 1.475974000  | -1.270475000 |
| 6  | 2.762238000  | -0.154492000 | 1.485517000  |
| 1  | 2.743975000  | 0.680000000  | 2.184624000  |
| 1  | 2.691800000  | -1.082943000 | 2.049851000  |
| 1  | 3.700909000  | -0.139960000 | 0.932648000  |
| 51 | 1.110485000  | -0.000727000 | 0.110979000  |

**Sb(CH<sub>3</sub>)<sub>3</sub>···GeFH<sub>3</sub>**

|    |              |              |              |
|----|--------------|--------------|--------------|
| 32 | 2.444206000  | 0.000016000  | -0.128010000 |
| 9  | 4.173012000  | -0.000031000 | 0.142155000  |
| 1  | 2.261216000  | 0.000894000  | -1.652732000 |
| 1  | 1.924538000  | -1.280292000 | 0.551014000  |
| 1  | 1.924396000  | 1.279465000  | 0.552526000  |
| 6  | -1.236939000 | 0.000682000  | 1.992293000  |
| 1  | -0.723818000 | -0.883163000 | 2.369452000  |
| 1  | -0.724450000 | 0.885135000  | 2.368884000  |
| 1  | -2.264624000 | 0.000429000  | 2.354138000  |
| 6  | -2.640292000 | 1.596634000  | -0.393162000 |
| 1  | -2.189636000 | 2.543662000  | -0.100222000 |
| 1  | -2.956379000 | 1.669253000  | -1.432606000 |
| 1  | -3.509961000 | 1.403807000  | 0.234094000  |
| 6  | -2.639602000 | -1.597369000 | -0.392137000 |
| 1  | -2.956231000 | -1.670216000 | -1.431401000 |
| 1  | -2.188332000 | -2.544149000 | -0.099355000 |
| 1  | -3.509027000 | -1.404893000 | 0.235565000  |
| 51 | -1.210949000 | 0.000003000  | -0.164204000 |

## Optimized coordinates of the monomers

### NH<sub>3</sub>

|   |          |           |           |
|---|----------|-----------|-----------|
| 1 | 2.558688 | -0.014591 | 0.941223  |
| 1 | 2.559356 | -0.807151 | -0.484853 |
| 1 | 2.555678 | 0.823913  | -0.458145 |
| 7 | 2.187317 | -0.000188 | -0.000242 |

### PH<sub>3</sub>

|    |          |           |           |
|----|----------|-----------|-----------|
| 1  | 1.801963 | -0.939007 | -0.726161 |
| 1  | 1.805583 | 1.097843  | -0.446652 |
| 1  | 1.799266 | -0.162011 | 1.177375  |
| 15 | 1.037894 | 0.000070  | -0.000265 |

### AsH<sub>3</sub>

|    |           |           |           |
|----|-----------|-----------|-----------|
| 1  | -2.968647 | -0.501406 | -1.095521 |
| 1  | -2.966587 | -0.497005 | 1.099036  |
| 1  | -2.542072 | 1.357325  | -0.002392 |
| 33 | -2.004918 | -0.067771 | -0.000013 |

### SbH<sub>3</sub>

|    |          |           |           |
|----|----------|-----------|-----------|
| 1  | 2.297066 | -0.349431 | 1.370789  |
| 1  | 2.274742 | -1.016156 | -1.003698 |
| 1  | 2.275069 | 1.371936  | -0.392851 |
| 51 | 1.338192 | -0.000694 | 0.001122  |

### N(CH<sub>3</sub>)<sub>3</sub>

|   |          |           |           |
|---|----------|-----------|-----------|
| 7 | 1.428240 | 0.030616  | -0.000731 |
| 6 | 1.868541 | -0.641102 | 1.204206  |
| 1 | 1.494496 | -0.111549 | 2.081179  |
| 1 | 1.477896 | -1.659141 | 1.225134  |
| 1 | 2.969187 | -0.692208 | 1.275500  |
| 6 | 1.869609 | -0.683513 | -1.180617 |
| 1 | 1.480654 | -1.702259 | -1.163931 |
| 1 | 1.494370 | -0.186894 | -2.076169 |
| 1 | 2.970309 | -0.735400 | -1.250086 |
| 6 | 1.891416 | 1.402448  | -0.024902 |
| 1 | 1.517798 | 1.904138  | -0.918312 |
| 1 | 1.517538 | 1.935413  | 0.850053  |
| 1 | 2.993390 | 1.471129  | -0.025896 |

### P(CH<sub>3</sub>)<sub>3</sub>

|   |          |           |           |
|---|----------|-----------|-----------|
| 6 | 1.868323 | -1.317709 | -1.034914 |
| 1 | 1.723814 | -2.297224 | -0.578036 |
| 1 | 1.243219 | -1.269129 | -1.927013 |

|    |          |           |           |
|----|----------|-----------|-----------|
| 1  | 2.915382 | -1.213570 | -1.328363 |
| 6  | 1.974264 | 1.466384  | -0.779474 |
| 1  | 1.353075 | 1.627845  | -1.661027 |
| 1  | 1.900935 | 2.354632  | -0.151240 |
| 1  | 3.012438 | 1.338939  | -1.094755 |
| 6  | 2.738095 | -0.166026 | 1.361598  |
| 1  | 2.698672 | 0.657430  | 2.075386  |
| 1  | 2.626929 | -1.097063 | 1.918220  |
| 1  | 3.712512 | -0.161629 | 0.867543  |
| 15 | 1.357037 | -0.001306 | 0.150732  |

**As(CH<sub>3</sub>)<sub>3</sub>**

|    |           |           |           |
|----|-----------|-----------|-----------|
| 6  | -1.691010 | -1.374405 | 1.163664  |
| 1  | -1.594198 | -2.362572 | 0.715634  |
| 1  | -1.021164 | -1.317874 | 2.020808  |
| 1  | -2.718391 | -1.230036 | 1.499058  |
| 6  | -1.829169 | 1.551282  | 0.874966  |
| 1  | -1.162817 | 1.727621  | 1.718469  |
| 1  | -1.823658 | 2.437046  | 0.240985  |
| 1  | -2.840433 | 1.378874  | 1.244372  |
| 6  | -2.785669 | -0.189274 | -1.296891 |
| 1  | -2.815594 | 0.625065  | -2.019705 |
| 1  | -2.734610 | -1.131160 | -1.841679 |
| 1  | -3.694389 | -0.170091 | -0.694619 |
| 33 | -1.188584 | -0.000721 | -0.157505 |

**Sb(CH<sub>3</sub>)<sub>3</sub>**

|    |          |           |           |
|----|----------|-----------|-----------|
| 6  | 1.809742 | -1.501892 | -1.253461 |
| 1  | 1.737296 | -2.495803 | -0.813542 |
| 1  | 1.211075 | -1.482311 | -2.163167 |
| 1  | 2.850048 | -1.296716 | -1.505350 |
| 6  | 1.858760 | 1.663533  | -0.967628 |
| 1  | 1.263586 | 1.825001  | -1.865452 |
| 1  | 1.814891 | 2.564716  | -0.357348 |
| 1  | 2.893464 | 1.475159  | -1.253403 |
| 6  | 2.791597 | -0.166118 | 1.458652  |
| 1  | 2.780947 | 0.653056  | 2.176299  |
| 1  | 2.759962 | -1.106380 | 2.007517  |
| 1  | 3.712384 | -0.121690 | 0.877565  |
| 51 | 1.083889 | -0.020824 | 0.142644  |

\*\*\*\*\*

**HF**

|   |          |           |           |
|---|----------|-----------|-----------|
| 9 | 2.729702 | 0.000561  | -0.000233 |
| 1 | 1.809460 | -0.014463 | 0.010082  |

**BrF**

|    |          |           |           |
|----|----------|-----------|-----------|
| 9  | 2.812059 | -0.000873 | -0.001074 |
| 35 | 1.060917 | 0.000382  | 0.000487  |

**SeF<sub>2</sub>**

|    |          |           |           |
|----|----------|-----------|-----------|
| 9  | 0.921751 | 1.425538  | -0.000028 |
| 9  | 2.935003 | -0.161339 | 0.000184  |
| 34 | 1.213448 | -0.274865 | -0.000068 |

**AsF<sub>3</sub>**

|    |           |           |           |
|----|-----------|-----------|-----------|
| 33 | -1.726184 | -0.000142 | -0.359150 |
| 9  | -1.236907 | 1.226146  | 0.727077  |
| 9  | -3.384453 | 0.074445  | 0.048831  |
| 9  | -1.356798 | -1.301156 | 0.687485  |

**GeF<sub>4</sub>**

|    |           |           |           |
|----|-----------|-----------|-----------|
| 32 | -0.736336 | -0.000478 | -0.000652 |
| 9  | -0.178335 | -0.348391 | -1.557523 |
| 9  | -2.426511 | -0.003796 | 0.002743  |
| 9  | -0.170301 | -1.169993 | 1.079708  |
| 9  | -0.174482 | 1.520826  | 0.473325  |

**SeFH**

|    |          |           |           |
|----|----------|-----------|-----------|
| 9  | 2.375021 | 0.129655  | 0.001805  |
| 34 | 0.637775 | -0.088432 | -0.000681 |
| 1  | 0.346402 | 1.353038  | -0.003684 |

**AsFH<sub>2</sub>**

|    |          |           |           |
|----|----------|-----------|-----------|
| 33 | 0.758105 | -0.130548 | 0.042359  |
| 9  | 2.471816 | 0.207555  | -0.056305 |
| 1  | 0.381903 | 1.206738  | 0.678940  |
| 1  | 0.424354 | 0.398128  | -1.351952 |

**GeFH<sub>3</sub>**

|    |          |           |           |
|----|----------|-----------|-----------|
| 32 | 1.958809 | 0.002824  | 0.003675  |
| 9  | 3.700544 | -0.009972 | -0.012557 |
| 1  | 1.530315 | -0.847258 | 1.212659  |
| 1  | 1.536547 | 1.474861  | 0.145076  |
| 1  | 1.505154 | -0.609243 | -1.332964 |
